# Supplementary material for: Hypoxia increases membrane metallo-endopeptidase expression in a novel lung cancer ex vivo model – role of tumor stroma cells
Source: PubMed Central journal article supplement (PMC3905926; doi:10.1186/1471-2407-14-40), 2014-01-25
Supplement: 1471-2407-14-40-S2.pdf [file 1471-2407-14-40-S2.pdf]

**Supplementary Table 3. Genes down-regulated by hypoxia**

| Gene symbol | Gene name                                                 | P       | FC   | Gene symbol  | Gene name                                              | P       | FC   |
|-------------|-----------------------------------------------------------|---------|------|--------------|--------------------------------------------------------|---------|------|
| PDK4        | Pyruvate dehydrogenase kinase, isozyme 4                  | 5,2E-06 | -2,0 | CASC5        | Cancer susceptibility candidate 5                      | 2,8E-04 | -2,3 |
| MANSC1      | MANSC domain containing 1                                 | 5,6E-06 | -2,3 | PBK          | PDZ binding kinase                                     | 2,9E-04 | -2,1 |
| CPM         | Carboxypeptidase M                                        | 8,6E-06 | -2,3 | DLGAP5       | Discs, large (Drosophila) homolog-associated protein 5 | 3,0E-04 | -2,3 |
| NQO1        | NAD(P)H dehydrogenase, quinone 1                          | 1,9E-05 | -2,4 | KIF11        | Kinesin family member 11                               | 3,0E-04 | -2,3 |
| CTSC        | Cathepsin C                                               | 2,4E-05 | -2,0 | TOP2A        | Topoisomerase (DNA) II alpha                           | 3,0E-04 | -3,3 |
| FAM72D      | Family with sequence similarity 72, member D              | 2,7E-05 | -2,2 | IGHD         | Immunoglobulin heavy constant delta                    | 3,3E-04 | -3,1 |
| SNORD52     | Small nucleolar RNA, C/D box 52                           | 3,0E-05 | -2,0 | LOC100293211 | LOC100293211                                           | 3,3E-04 | -3,3 |
| CEACAM6     | Carcinoembryonic antigen-related cell adhesion molecule 6 | 4,2E-05 | -4,0 | PLA2G7       | Phospholipase A2, group VII                            | 3,8E-04 | -2,7 |
| ACACA       | Acetyl-Coenzyme A carboxylase alpha                       | 5,2E-05 | -2,0 | DHCR24       | 24-dehydrocholesterol reductase                        | 3,8E-04 | -2,6 |
| AURKA       | Aurora kinase A                                           | 5,5E-05 | -2,1 | G6PD         | Glucose-6-phosphate dehydrogenase                      | 4,2E-04 | -2,3 |
| FOXM1       | Forkhead box M1                                           | 6,9E-05 | -2,2 | IGK@         | Immunoglobulin kappa locus                             | 4,3E-04 | -2,8 |
| LOC652493   | LOC652493                                                 | 1,1E-04 | -2,9 | IGHA1        | Immunoglobulin heavy constant alpha 1                  | 5,2E-04 | -2,5 |
| NUF2        | NDC80 kinetochore complex component, homolog              | 1,2E-04 | -2,1 | KIF18A       | Kinesin family member 18A                              | 5,2E-04 | -2,2 |
| DTL         | Denticleless homolog                                      | 1,2E-04 | -2,1 | IGKC         | Immunoglobulin kappa constant                          | 5,3E-04 | -2,7 |
| PLS1        | Plastin 1 (I isoform)                                     | 1,3E-04 | -2,0 | CCNB2        | Cyclin B2                                              | 5,5E-04 | -2,5 |
| KIF20A      | Kinesin family member 20A                                 | 1,3E-04 | -2,3 | AKR1C3       | Aldo-keto reductase family 1, member C3                | 5,5E-04 | -2,1 |
| MELK        | Maternal embryonic leucine zipper kinase                  | 1,5E-04 | -2,2 | NCAPG        | Non-SMC condensin I complex, subunit G                 | 5,9E-04 | -2,3 |
| IGLJ3       | Immunoglobulin lambda joining 3                           | 1,8E-04 | -2,9 | CENPF        | Centromere protein F                                   | 7,7E-04 | -2,3 |
| LRIG3       | Leucine-rich repeats and immunoglobulin-like domains 3    | 1,8E-04 | -2,2 | TPX2         | TPX2, microtubule-associated, homolog                  | 8,3E-04 | -2,4 |
| ASPM        | Asp (abnormal spindle) homolog                            | 2,0E-04 | -2,5 | CCDC102B     | Coiled-coil domain containing 102B                     | 8,8E-04 | -2,2 |
| BUB1        | Budding uninhibited by benzimidazoles 1 homolog           | 2,1E-04 | -2,3 | CYP24A1      | Cytochrome P450, family 24, subfamily A, polypeptide 1 | 9,0E-04 | -2,3 |
| SPAG5       | Sperm associated antigen 5                                | 2,1E-04 | -2,1 | LUM          | Lumican                                                | 9,5E-04 | -3,4 |
| CCNB1       | Cyclin B1                                                 | 2,2E-04 | -2,5 | HELLS        | Helicase, lymphoid-specific                            | 9,7E-04 | -2,0 |
| IGHM        | Immunoglobulin heavy constant mu                          | 2,4E-04 | -3,1 | CDC2         | Cell division cycle 2                                  | 9,8E-04 | -2,4 |
| GSDMC       | Gasdermin C                                               | 2,6E-04 | -2,0 | LOC100290146 | LOC100290146                                           | 1,0E-03 | -2,4 |
| BUB1B       | Budding uninhibited by benzimidazoles 1 homolog           | 2,6E-04 | -2,2 | KIAA0101     | KIAA0101                                               | 1,1E-03 | -2,5 |
| CEACAM5     | Carcinoembryonic antigen-related cell adhesion molecule 5 | 2,7E-04 | -3,8 | IGKV3D-11    | Immunoglobulin kappa variable 3D-11                    | 1,1E-03 | -3,0 |
| ARHGAP11A   | Rho GTPase activating protein 11A                         | 2,7E-04 | -2,3 | LOC642838    | LOC642838                                              | 1,1E-03 | -2,2 |

FC, fold-change

**Continued: Supplementary Table 2. Genes down-regulated by hypoxia**

| Gene symbol | Gene name                                                    | <i>P</i> | FC   | Gene symbol  | Gene name                             | <i>P</i> | FC   |
|-------------|--------------------------------------------------------------|----------|------|--------------|---------------------------------------|----------|------|
| VSIG6       | V-set and immunoglobulin domain containing 6                 | 1,1E-03  | -2,9 | KIAA1199     | KIAA1199                              | 1,7E-03  | -2,8 |
| IL7R        | Interleukin 7 receptor                                       | 1,1E-03  | -2,1 | SFTPB        | Surfactant protein B                  | 1,8E-03  | -2,9 |
| KIF4A       | Kinesin family member 4A                                     | 1,2E-03  | -2,2 | SULF1        | Sulfatase 1                           | 1,9E-03  | -2,7 |
| SLC27A2     | Solute carrier family 27 (fatty acid transporter), member 27 | 1,3E-03  | -2,0 | CLDN10       | Claudin 10                            | 2,0E-03  | -2,4 |
| KIF23       | Kinesin family member 23                                     | 1,3E-03  | -2,2 | TMPRSS4      | Transmembrane protease, serine 4      | 2,2E-03  | -2,1 |
| FAM111B     | Family with sequence similarity 111, member B                | 1,3E-03  | -2,1 | CHI3L1       | Chitinase 3-like 1                    | 2,4E-03  | -2,1 |
| SLC34A2     | Solute carrier family 34 (sodium phosphate), member 2        | 1,3E-03  | -2,8 | HMMR         | Hyaluronan-mediated motility receptor | 2,7E-03  | -2,0 |
| CENPI       | Centromere protein I                                         | 1,3E-03  | -2,6 | CKMT1A       | Creatine kinase, mitochondrial 1A     | 2,7E-03  | -2,1 |
| FAM46C      | Family with sequence similarity 46, member C                 | 1,4E-03  | -2,2 | PI15         | Peptidase inhibitor 15                | 3,4E-03  | -3,4 |
| MKI67       | Antigen identified by monoclonal antibody Ki-67              | 1,4E-03  | -2,2 | LAMB1        | Laminin, beta 1                       | 3,7E-03  | -2,1 |
| NAPEPLD     | N-acyl phosphatidylethanolamine phospholipase D              | 1,5E-03  | -2,2 | LOC100293539 | LOC100293539                          | 4,1E-03  | -2,7 |
| CENPE       | Centromere protein E                                         | 1,6E-03  | -2,1 |              |                                       |          |      |

FC, fold-change
